# Supplementary material for: Concentration-dependent kinetic study of graphene oxide (GO) reduction using biophenol and electrochemical analysis
Source: Royal Society of Chemistry journal article supplement (doi:10.1039/d4su00430b), 2024-11-18
Supplement: d4su00430b1.pdf [file d4su00430b1.pdf]

## Supplementary Information

### Concentration-Dependent Kinetic Study of Graphene Oxide (GO) Reduction Using Biophenol and Electrochemical Analysis

Saad Zafar<sup>†</sup>, Sanjana Krishna Mani<sup>†</sup>, Monisha Monisha, Bimlesh Lochab\*

Materials Chemistry Laboratory, Department of Chemistry, School of Natural Sciences, Shiv Nadar Institution of Eminence, Gautam Buddha Nagar, Uttar Pradesh, 201314, India

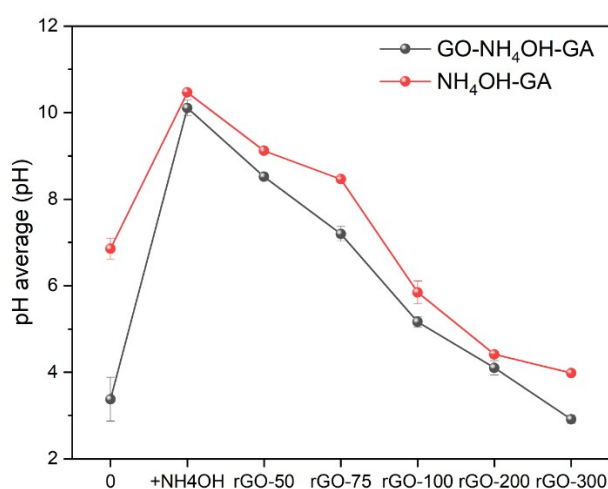

**Figure S1.** pH variation of the GO and  $\text{NH}_4\text{OH}$  solution with the sequential addition of gallic acid to obtain  $\text{rGO}_{50}$  to  $\text{rGO}_{300}$ .

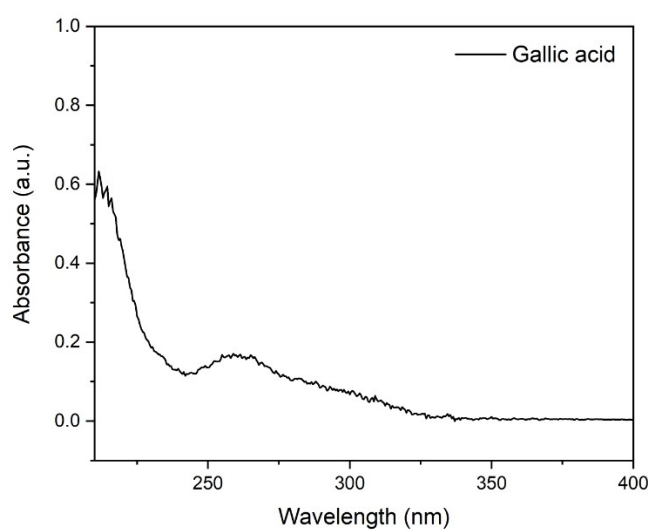

**Figure S2.** UV-vis. plot of gallic acid.

**Table S1.** Variation of slope in plot within the initial first hour of the reduction reaction.

| Ratio              | Slope (nm/h) |
|--------------------|--------------|
| rGO <sub>50</sub>  | 19.25        |
| rGO <sub>75</sub>  | 28.39        |
| rGO <sub>100</sub> | 21.65        |
| rGO <sub>200</sub> | 12.21        |
| rGO <sub>300</sub> | 8.571        |

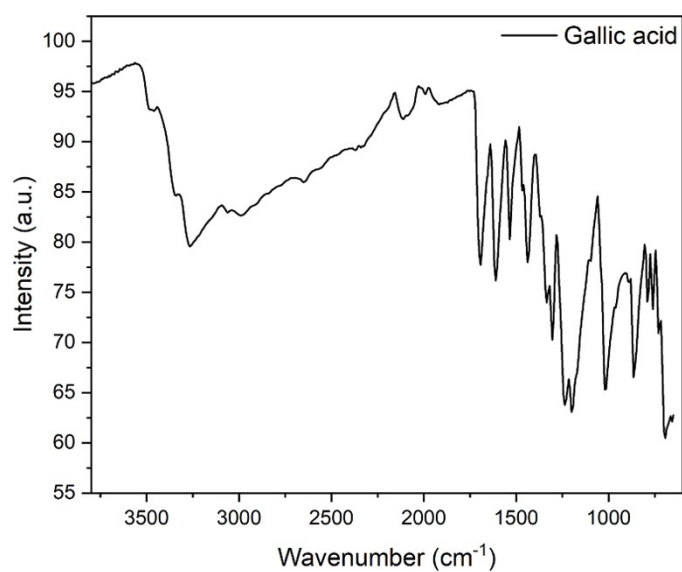

**Figure S3.** FT-IR spectra of gallic acid.

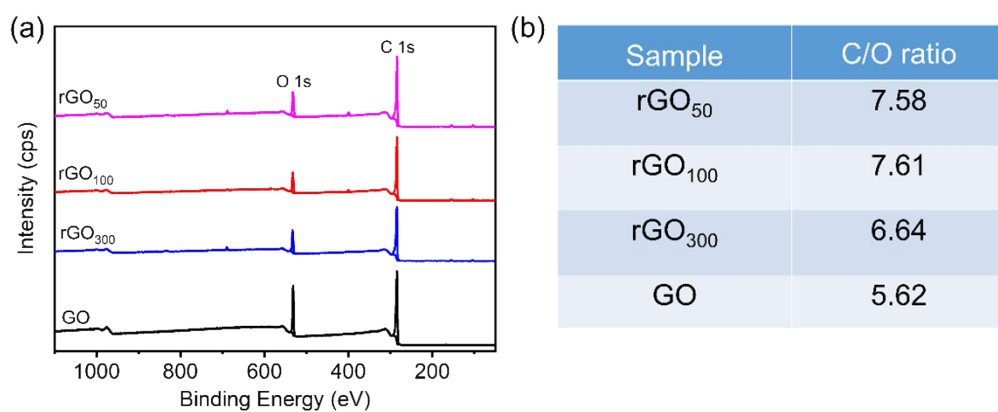

**Figure S4.** (a) XPS wide survey spectra of GO, and reduced GOs, and (b) carbon to oxygen ratio evaluated from atomic weight percentage in XPS wide spectra.

**Table S2.** Comparative specific capacitance values reported for rGO obtained using different sustainable reducing agents.

| Sample           | Reducing agent | Capacity (F g <sup>-1</sup> ) | Current density (A g <sup>-1</sup> ) |
|------------------|----------------|-------------------------------|--------------------------------------|
| rGO <sup>1</sup> | Urea           | 255                           | 0.5                                  |
| rGO <sup>2</sup> | Caffeic acid   | 136                           | 1.0                                  |
| rGO <sup>3</sup> | Ascorbic acid  | 48.3                          | 0.1                                  |
| rGO (our work)   | Gallic acid    | 301.7                         | 1.0                                  |

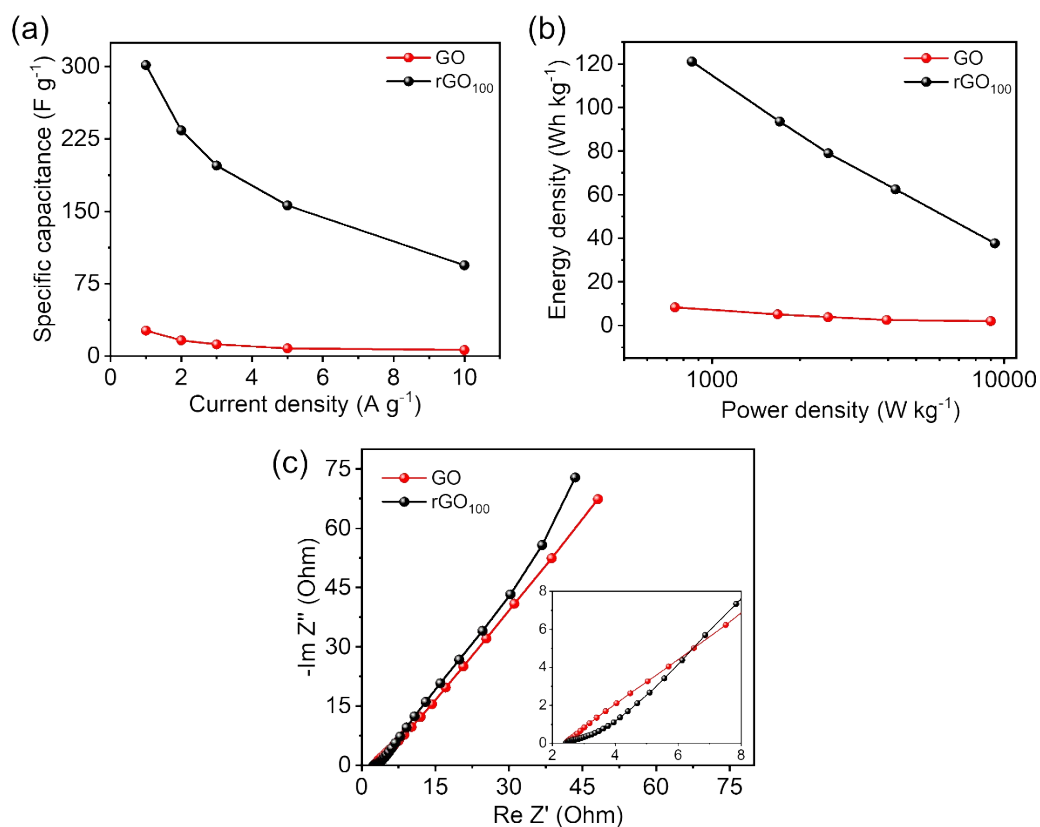

**Figure S5.** (a) Plot depicting specific capacitance against current density, (b) Ragone plot, and (c) EIS spectra of GO and rGO<sub>100</sub> (inset shows magnified EIS spectra).

#### Reference:

1. Z. Lei, L. Lu and X. S. Zhao, *Energy Environ. Sci.*, 2012, **5**, 6391-6399.
2. Z. Bo, X. Shuai, S. Mao, H. Yang, J. Qian, J. Chen, J. Yan and K. Cen, *Sci. Rep.*, 2014, **4**, 4684.
3. S. Rai, R. Bhujel, M. Khadka, R. L. Chetry, B. P. Swain and J. Biswas, *Mater. Today Chem.*, 2021, **20**, 100472.
